# Supplementary material for: Li6.58Na7.43Sr4(B9O18)(B12O24)Cl: unprecedented combination of the largest two highly polymerized isolated B–O clusters with novel isolated B9O18 FBB
Source: Royal Society of Chemistry journal article supplement (doi:10.1039/d2qi01311h), 2022-01-01
Supplement: d2qi01311h1.pdf [file d2qi01311h1.pdf]

## Supporting Information

### **Li<sub>6.58</sub>Na<sub>7.43</sub>Sr<sub>4</sub>(B<sub>9</sub>O<sub>18</sub>)(B<sub>12</sub>O<sub>24</sub>)Cl: Unprecedented combination of the largest two highly polymerized isolated B-O clusters with novel isolated B<sub>9</sub>O<sub>18</sub> FBB**

Feixiang Wang<sup>a,b</sup>, Yun Yang<sup>\*a,b</sup>, Congcong Jin<sup>a,b</sup>, Shilie Pan<sup>\*a,b</sup>

<sup>a</sup>Research Center for Crystal Materials; CAS Key Laboratory of Functional Materials and Devices for Special Environments; Xinjiang Technical Institute of Physics & Chemistry, CAS, 40-1 South Beijing Road, Urumqi 830011, China.

<sup>b</sup>Center of Materials Science and Optoelectronics Engineering, University of Chinese Academy of Sciences, Beijing 100049, China.

\*Corresponding authors: yangyun@ms.xjb.ac.cn, slpan@ms.xjb.ac.cn.

## Table of Contents

- Table S1 Atomic coordinates and equivalent isotropic displacement parameters.
- Table S2 Selected bond lengths [Å] and angles [deg] for  $\text{Li}_{6.58}\text{Na}_{7.43}\text{Sr}_4(\text{B}_9\text{O}_{18})(\text{B}_{12}\text{O}_{24})\text{Cl}$ .
- Table S3 Basic information of anhydrous borates containing two kinds of isolated B–O clusters.
- Table S4 Basic information of anhydrous borates with petal-like  $\text{B}_{12}\text{O}_{24}$  clusters.
- Table S5 The assignments of the IR absorption peaks for  $\text{Li}_{6.58}\text{Na}_{7.43}\text{Sr}_4(\text{B}_9\text{O}_{18})(\text{B}_{12}\text{O}_{24})\text{Cl}$ .
- Fig. S1 Coordination polyhedra and arrangement mode of the (a) Li(1); (b) Na(1); (c) Sr(2) and (d) Sr(1) atoms in the title compound.
- Fig. S2 The  $[\text{B}_9\text{O}_{18}]^{9-}$  group in  $\text{Na}_{11}\text{B}_{21}\text{O}_{36}\text{X}_2$  ( $\text{X} = \text{Cl}, \text{Br}$ ) acting as a connecting unit.
- Fig. S3 Elemental analysis of  $\text{Li}_{6.58}\text{Na}_{7.43}\text{Sr}_4(\text{B}_9\text{O}_{18})(\text{B}_{12}\text{O}_{24})\text{Cl}$ . Energy dispersive X-ray spectroscopy (EDS) was performed to verify the presence of the corresponding elements (except Li) in the compound.
- Fig. S4 The structural transformation of space group from  $\text{LiNa}_2\text{Sr}_8(\text{B}_{12}\text{O}_{24})\text{F}_6\text{Cl}$  to  $\text{Ca}_6\text{Li}_2\text{Na}_8\text{Be}_8(\text{BO}_3)_8(\text{B}_{12}\text{O}_{24})\text{F}_2$  to  $\text{Li}_{6.58}\text{Na}_{7.43}\text{Sr}_4(\text{B}_9\text{O}_{18})(\text{B}_{12}\text{O}_{24})\text{Cl}$ .
- Fig. S5 The  $\text{BO}_3$  and  $\text{B}_{12}\text{O}_{24}$  groups in  $\text{M}_3\text{LiNa}_4\text{Be}_4\text{B}_{10}\text{O}_{24}\text{F}$  ( $\text{M} = \text{Sr}, \text{Cd}, \text{Ca}$ ) with the lamellar arrangement.
- Fig. S6 The infrared spectrum of  $\text{Li}_{6.58}\text{Na}_{7.43}\text{Sr}_4(\text{B}_9\text{O}_{18})(\text{B}_{12}\text{O}_{24})\text{Cl}$
- Fig. S7 The X-ray diffraction patterns of  $\text{Li}_{6.58}\text{Na}_{7.43}\text{Sr}_4(\text{B}_9\text{O}_{18})(\text{B}_{12}\text{O}_{24})\text{Cl}$  before and after melting.

**Table S1** Atomic coordinates ( $\times 10^4$ ), equivalent isotropic displacement parameters ( $\text{\AA}^2 \times 10^3$ ) and BVS for  $\text{Li}_{6.58}\text{Na}_{7.43}\text{Sr}_4(\text{B}_9\text{O}_{18})(\text{B}_{12}\text{O}_{24})\text{Cl}$ . U(eq) is defined as one third of the trace of the orthogonalized  $U_{ij}$  tensor.<sup>a,b</sup>

| Atom          | x        | y       | z       | U(eq) | BVS  |
|---------------|----------|---------|---------|-------|------|
| Li(1)         | 2983(8)  | 3669(9) | 5951(2) | 19(1) | 1.06 |
| Na(1)         | 6000(2)  | 6512(2) | 6879(1) | 17(1) | 1.05 |
| Na(2A)/Li(2A) | 3333     | 6667    | 5130(1) | 14(1) | 1.16 |
| Sr(1)         | 6667     | 3333    | 6294(1) | 11(1) | 1.77 |
| Sr(2)         | 0        | 0       | 5954(1) | 11(1) | 2.07 |
| B(1)          | 8488(5)  | 6823(5) | 4999(2) | 9(1)  | 3.05 |
| B(2)          | 6079(5)  | 5927(4) | 5651(2) | 7(1)  | 3.01 |
| B(3)          | 2382(4)  | 2386(5) | 6994(2) | 8(1)  | 2.99 |
| B(4)          | 4833(6)  | 2657(6) | 7500    | 7(1)  | 3.05 |
| O(1)          | 10062(3) | 7857(3) | 5278(1) | 9(1)  | 2.05 |
| O(2)          | 7289(3)  | 5681(3) | 5408(1) | 10(1) | 2.05 |
| O(3)          | 5810(3)  | 7169(3) | 5443(1) | 11(1) | 2.12 |
| O(4)          | 5238(3)  | 5010(3) | 6082(1) | 9(1)  | 2.04 |
| O(5)          | 1639(3)  | 2426(3) | 6531(1) | 10(1) | 2.10 |
| O(6)          | 1754(4)  | 2547(5) | 7500    | 11(1) | 2.05 |
| O(7)          | 3793(3)  | 2242(3) | 6998(1) | 10(1) | 1.99 |
| O(8)          | 5583(4)  | 1621(4) | 7500    | 13(1) | 1.95 |
| Cl(1)         | 3333     | 6667    | 7500    | 28(1) | 0.65 |

<sup>a</sup> Bond valences calculated with the program Bond Valence Calculator Version 2.00, Hormillosa, C., Healy, S., Stephen, T. McMaster University (1993).

<sup>b</sup> Valence sums calculated with the formula:  $S_i = \exp[(R_0 - R_i)/B]$ , where  $S_i$  = valence of bond “*i*” and  $B = 0.37$ .

**Table S2** Selected bond lengths [Å] and angles [deg.] for  $\text{Li}_{6.58}\text{Na}_{7.43}\text{Sr}_4(\text{B}_9\text{O}_{18})(\text{B}_{12}\text{O}_{24})\text{Cl}$ .

|                     |            |                     |           |
|---------------------|------------|---------------------|-----------|
| Li(1)-O(4)          | 1.855(7)   | Sr(1)-O(7)#1        | 2.897(2)  |
| Li(1)-O(5)          | 1.857(7)   | Sr(1)-O(7)#2        | 2.897(2)  |
| Li(1)-O(1)#2        | 2.019(7)   | Sr(2)-O(1)#1        | 2.607(2)  |
| Li(1)-O(3)#10       | 2.186(7)   | Sr(2)-O(1)#3        | 2.607(2)  |
| Na(1)-O(4)          | 2.285(3)   | Sr(2)-O(1)#4        | 2.607(2)  |
| Na(1)-O(5)#10       | 2.344(3)   | Sr(2)-O(5)          | 2.439(2)  |
| Na(1)-O(6)#10       | 2.648(3)   | Sr(2)-O(5)#5        | 2.439(2)  |
| Na(1)-O(7)#2        | 2.450(3)   | Sr(2)-O(5)#6        | 2.439(2)  |
| Na(1)-O(8)#2        | 2.480(3)   | B(1)-O(1)           | 1.457(4)  |
| Na(1)-Cl(1)         | 2.9698(15) | B(1)-O(1)#11        | 1.466(4)  |
| Na(2A)-O(2)#11      | 2.357(3)   | B(1)-O(2)           | 1.475(4)  |
| Na(2A)-O(2)#12      | 2.357(3)   | B(1)-O(3)#14        | 1.482(4)  |
| Na(2A)-O(2)#13      | 2.357(3)   | B(2)-O(2)           | 1.388(4)  |
| Na(2A)-O(3)         | 2.243(3)   | B(2)-O(3)           | 1.394(4)  |
| Na(2A)-O(3)#3       | 2.243(3)   | B(2)-O(4)           | 1.330(4)  |
| Na(2A)-O(3)#10      | 2.243(3)   | B(3)-O(5)           | 1.333(4)  |
| Sr(1)-O(2)          | 2.914(2)   | B(3)-O(6)           | 1.401(4)  |
| Sr(1)-O(2)#1        | 2.914(2)   | B(3)-O(7)           | 1.384(4)  |
| Sr(1)-O(2)#2        | 2.914(2)   | B(4)-O(7)           | 1.485(4)  |
| Sr(1)-O(4)#1        | 2.558(2)   | B(4)-O(7)#8         | 1.485(4)  |
| Sr(1)-O(4)#2        | 2.558(2)   | B(4)-O(8)           | 1.446(6)  |
| Sr(1)-O(4)          | 2.558(2)   | B(4)-O(8)#2         | 1.450(6)  |
| Sr(1)-O(7)          | 2.897(2)   |                     |           |
| O(1)#1-Li(1)-O(3)#3 | 67.3(2)    | O(7)#1-Sr(1)-O(2)#1 | 120.15(7) |
| O(4)-Li(1)-O(1)#1   | 121.3(4)   | O(7)-Sr(1)-O(2)     | 120.15(7) |
| O(4)-Li(1)-O(3)#3   | 128.5(4)   | O(7)-Sr(1)-O(2)#1   | 86.42(7)  |
| O(4)-Li(1)-O(5)     | 118.1(3)   | O(7)-Sr(1)-O(2)#2   | 150.58(7) |
| O(5)-Li(1)-O(1)#1   | 106.4(3)   | O(7)#2-Sr(1)-O(2)#1 | 150.58(7) |
| O(5)-Li(1)-O(3)#3   | 104.0(3)   | O(7)#1-Sr(1)-O(2)#2 | 86.42(7)  |
| O(4)-Na(1)-O(5)#10  | 100.71(10) | O(7)#1-Sr(1)-O(7)#2 | 88.68(7)  |
| O(4)-Na(1)-O(6)#10  | 156.73(10) | O(7)-Sr(1)-O(7)#2   | 88.68(7)  |
| O(4)-Na(1)-O(7)#2   | 92.98(10)  | O(7)#1-Sr(1)-O(7)   | 88.68(7)  |
| O(4)-Na(1)-O(8)#2   | 99.11(9)   | O(1)#3-Sr(2)-O(1)#1 | 84.50(8)  |

|                        |            |                      |           |
|------------------------|------------|----------------------|-----------|
| O(5)#10-Na(1)-O(6)#10  | 56.02(8)   | O(1)#3-Sr(2)-O(1)#4  | 84.50(8)  |
| O(5)#10-Na(1)-O(7)#2   | 92.75(10)  | O(1)#4-Sr(2)-O(1)#1  | 84.50(8)  |
| O(5)#10-Na(1)-O(8)#2   | 144.64(12) | O(5)-Sr(2)-O(1)#1    | 75.88(8)  |
| O(7)#2-Na(1)-O(6)#10   | 88.74(11)  | O(5)-Sr(2)-O(1)#3    | 120.27(8) |
| O(7)#2-Na(1)-O(8)#2    | 57.17(10)  | O(5)#6-Sr(2)-O(1)#3  | 75.88(7)  |
| O(8)#2-Na(1)-O(6)#10   | 101.27(9)  | O(5)#5-Sr(2)-O(1)#1  | 120.27(8) |
| O(4)-Na(1)-Cl(1)       | 116.74(8)  | O(5)#5-Sr(2)-O(1)#3  | 145.90(8) |
| O(5)#10-Na(1)-Cl(1)    | 102.76(8)  | O(5)#6-Sr(2)-O(1)#1  | 145.90(8) |
| O(6)#10-Na(1)-Cl(1)    | 72.95(8)   | O(5)-Sr(2)-O(1)#4    | 145.90(8) |
| O(7)#2-Na(1)-Cl(1)     | 142.51(8)  | O(5)#5-Sr(2)-O(1)#4  | 75.88(7)  |
| O(8)#2-Na(1)-Cl(1)     | 93.93(8)   | O(5)#6-Sr(2)-O(1)#4  | 120.27(8) |
| O(2)#12-Na(2A)-O(2)#13 | 92.16(12)  | O(5)#5-Sr(2)-O(5)#6  | 90.18(8)  |
| O(2)#12-Na(2A)-O(2)#11 | 92.16(12)  | O(5)-Sr(2)-O(5)#6    | 90.18(8)  |
| O(2)#11-Na(2A)-O(2)#13 | 92.16(12)  | O(5)-Sr(2)-O(5)#5    | 90.18(8)  |
| O(3)-Na(2A)-O(2)#13    | 97.58(9)   | O(1)-B(1)-O(1)#11    | 112.8(3)  |
| O(3)#3-Na(2A)-O(2)#12  | 97.58(9)   | O(1)#11-B(1)-O(2)    | 111.2(3)  |
| O(3)#10-Na(2A)-O(2)#11 | 97.58(9)   | O(1)-B(1)-O(2)       | 108.0(3)  |
| O(3)#10-Na(2A)-O(2)#13 | 153.17(11) | O(1)-B(1)-O(3)#14    | 111.9(3)  |
| O(3)-Na(2A)-O(2)#12    | 153.17(11) | O(1)#11-B(1)-O(3)#14 | 104.7(3)  |
| O(3)#10-Na(2A)-O(2)#12 | 62.65(8)   | O(2)-B(1)-O(3)#14    | 108.0(3)  |
| O(3)#3-Na(2A)-O(2)#11  | 153.17(11) | O(2)-B(2)-O(3)       | 118.5(3)  |
| O(3)-Na(2A)-O(2)#11    | 62.65(8)   | O(4)-B(2)-O(2)       | 119.7(3)  |
| O(3)#3-Na(2A)-O(2)#13  | 62.65(8)   | O(4)-B(2)-O(3)       | 121.7(3)  |
| O(3)#3-Na(2A)-O(3)     | 109.11(10) | O(5)-B(3)-O(6)       | 119.3(3)  |
| O(3)#10-Na(2A)-O(3)    | 109.11(10) | O(5)-B(3)-O(7)       | 122.6(3)  |
| O(3)#10-Na(2A)-O(3)#3  | 109.11(10) | O(7)-B(3)-O(6)       | 118.1(3)  |
| O(2)#2-Sr(1)-O(2)      | 71.26(7)   | O(7)#8-B(4)-O(7)     | 110.7(4)  |
| O(2)#2-Sr(1)-O(2)#1    | 71.26(7)   | O(8)-B(4)-O(7)       | 107.2(3)  |
| O(2)-Sr(1)-O(2)#1      | 71.26(7)   | O(8)#2-B(4)-O(7)     | 109.2(3)  |
| O(7)#2-Sr(1)-O(2)#2    | 120.15(7)  | O(8)-B(4)-O(7)#8     | 107.2(3)  |
| O(7)#1-Sr(1)-O(2)      | 150.58(7)  | O(8)#2-B(4)-O(7)#8   | 109.2(3)  |
| O(7)#2-Sr(1)-O(2)      | 86.42(7)   | O(8)-B(4)-O(8)#2     | 113.3(4)  |

Symmetry transformations used to generate equivalent atoms:

#1 -y+1,x-y,z    #2 -x+y+1,-x+1,z    #3 -x+y,-x+1,z  
#4 x-1,y-1,z    #5 -x+y,-x,z    #6 -y,x-y,z    #7 -y+1,x-y+1,-z+3/2  
#8 x,y,-z+3/2    #9 -x+y,-x+1,-z+3/2    #10 -y+1,x-y+1,z  
#11 y,-x+y+1,-z+1    #12 x-y,x,-z+1    #13 -x+1,-y+1,-z+1  
#14 x-y+1,x,-z+1

**Table S3** Basic information of anhydrous borates containing two kinds of isolated B–O clusters.

| No. | Chemical Formula <sup>a</sup>                                                                                                                                  | Space Group | B-O Clusters<br>(I-B-O + II-B-O + III-B-O)          | $N_B$ <sup>b</sup> | Cation /Boron Ratio | Reference |
|-----|----------------------------------------------------------------------------------------------------------------------------------------------------------------|-------------|-----------------------------------------------------|--------------------|---------------------|-----------|
| 1   | Ho <sub>31</sub> O <sub>27</sub> (BO <sub>3</sub> ) <sub>3</sub> (BO <sub>4</sub> ) <sub>6</sub>                                                               | $R\bar{3}$  | [BO <sub>3</sub> ]+[BO <sub>4</sub> ]               | 2                  | 3.40                | [1]       |
| 2   | Ni <sub>7</sub> U(BO <sub>3</sub> ) <sub>2</sub> (BO <sub>4</sub> ) <sub>2</sub> O <sub>2</sub>                                                                | $Pnmm$      | [BO <sub>3</sub> ]+[BO <sub>4</sub> ]               | 2                  | 2.00                | [2]       |
| 3   | Al <sub>8</sub> (BO <sub>3</sub> ) <sub>4</sub> (B <sub>2</sub> O <sub>5</sub> )F <sub>8</sub>                                                                 | $P4_2/nmc$  | [BO <sub>3</sub> ]+[B <sub>2</sub> O <sub>5</sub> ] | 3                  | 1.50                | [3]       |
| 4   | Ba <sub>3</sub> Zn(BO <sub>3</sub> )(B <sub>2</sub> O <sub>5</sub> )F                                                                                          | $P2_1/c$    | [BO <sub>3</sub> ]+[B <sub>2</sub> O <sub>5</sub> ] | 3                  | 1.33                | [4]       |
| 5   | Ba <sub>4</sub> Zn <sub>2</sub> (BO <sub>3</sub> ) <sub>2</sub> (B <sub>2</sub> O <sub>5</sub> )F <sub>2</sub>                                                 | $C2/c$      | [BO <sub>3</sub> ]+[B <sub>2</sub> O <sub>5</sub> ] | 3                  | 1.50                | [4]       |
| 6   | Ba <sub>2</sub> Sc <sub>2</sub> (BO <sub>3</sub> ) <sub>2</sub> (B <sub>2</sub> O <sub>5</sub> )                                                               | $P2_1/c$    | [BO <sub>3</sub> ]+[B <sub>2</sub> O <sub>5</sub> ] | 3                  | 1.00                | [5]       |
| 7   | Ba <sub>5</sub> (BO <sub>3</sub> ) <sub>2</sub> (B <sub>2</sub> O <sub>5</sub> )                                                                               | $C2/c$      | [BO <sub>3</sub> ]+[B <sub>2</sub> O <sub>5</sub> ] | 3                  | 1.20                | [6]       |
| 8   | Cu <sub>15</sub> (BO <sub>3</sub> ) <sub>6</sub> (B <sub>2</sub> O <sub>5</sub> ) <sub>2</sub> O <sub>2</sub>                                                  | $P\bar{1}$  | [BO <sub>3</sub> ]+[B <sub>2</sub> O <sub>5</sub> ] | 3                  | 1.50                | [7]       |
| 9   | Cu <sub>9</sub> Ti <sub>2</sub> (BO <sub>3</sub> ) <sub>2</sub> (B <sub>2</sub> O <sub>5</sub> ) <sub>2</sub> O <sub>6</sub>                                   | $P\bar{1}$  | [BO <sub>3</sub> ]+[B <sub>2</sub> O <sub>5</sub> ] | 3                  | 1.83                | [8]       |
| 10  | K <sub>4</sub> Sr <sub>4</sub> (UO <sub>2</sub> ) <sub>13</sub> (BO <sub>3</sub> ) <sub>2</sub> (B <sub>2</sub> O <sub>5</sub> ) <sub>2</sub> O <sub>12</sub>  | $P\bar{1}$  | [BO <sub>3</sub> ]+[B <sub>2</sub> O <sub>5</sub> ] | 3                  | 1.33                | [9]       |
| 11  | LiNa <sub>5</sub> Be <sub>12</sub> (BO <sub>3</sub> ) <sub>6</sub> (B <sub>2</sub> O <sub>5</sub> ) <sub>3</sub>                                               | $Pc$        | [BO <sub>3</sub> ]+[B <sub>2</sub> O <sub>5</sub> ] | 3                  | 1.50                | [10]      |
| 12  | Na <sub>2</sub> Be <sub>4</sub> (BO <sub>3</sub> ) <sub>2</sub> (B <sub>2</sub> O <sub>5</sub> )                                                               | $P1$        | [BO <sub>3</sub> ]+[B <sub>2</sub> O <sub>5</sub> ] | 3                  | 1.50                | [10]      |
| 13  | Pb <sub>8</sub> (BO <sub>3</sub> ) <sub>2</sub> (B <sub>2</sub> O <sub>5</sub> )O <sub>3</sub>                                                                 | $Ama2$      | [BO <sub>3</sub> ]+[B <sub>2</sub> O <sub>5</sub> ] | 3                  | 2.00                | [11]      |
| 14  | Pb <sub>3</sub> Ba <sub>7</sub> (BO <sub>3</sub> ) <sub>5</sub> (B <sub>2</sub> O <sub>5</sub> )F                                                              | $Pmn2_1$    | [BO <sub>3</sub> ]+[B <sub>2</sub> O <sub>5</sub> ] | 3                  | 1.43                | [12]      |
| 15  | Sr <sub>2</sub> Sc <sub>2</sub> (BO <sub>3</sub> ) <sub>2</sub> (B <sub>2</sub> O <sub>5</sub> )                                                               | $P\bar{1}$  | [BO <sub>3</sub> ]+[B <sub>2</sub> O <sub>5</sub> ] | 3                  | 1.00                | [5]       |
| 16  | Sr <sub>2</sub> LiBe(BO <sub>3</sub> )(B <sub>2</sub> O <sub>5</sub> )                                                                                         | $P2_1/c$    | [BO <sub>3</sub> ]+[B <sub>2</sub> O <sub>5</sub> ] | 3                  | 1.33                | [13]      |
| 17  | Ca <sub>10</sub> Ge <sub>16</sub> (BO <sub>4</sub> ) <sub>2</sub> (B <sub>2</sub> O <sub>7</sub> ) <sub>2</sub> O <sub>29</sub>                                | $Pba2$      | [BO <sub>4</sub> ]+[B <sub>2</sub> O <sub>7</sub> ] | 3                  | 4.33                | [14]      |
| 18  | CsZn <sub>2</sub> B <sub>3</sub> O <sub>7</sub> /Cs <sub>3</sub> Zn <sub>6</sub> (BO <sub>3</sub> ) <sub>3</sub> (B <sub>3</sub> O <sub>6</sub> ) <sub>2</sub> | $Cmc2_1$    | [BO <sub>3</sub> ]+[B <sub>3</sub> O <sub>6</sub> ] | 4                  | 1.00                | [15]      |
| 19  | Cs <sub>3</sub> Zn <sub>6</sub> (BO <sub>3</sub> ) <sub>3</sub> (B <sub>3</sub> O <sub>6</sub> ) <sub>2</sub>                                                  | $Cmc2_1$    | [BO <sub>3</sub> ]+[B <sub>3</sub> O <sub>6</sub> ] | 4                  | 1.00                | [16]      |

|    |                                                                                                                                                                                  |            |                                                                            |    |      |              |
|----|----------------------------------------------------------------------------------------------------------------------------------------------------------------------------------|------------|----------------------------------------------------------------------------|----|------|--------------|
| 20 | $\text{K}_3\text{Be}_6(\text{BO}_3)_3(\text{B}_3\text{O}_6)_2$                                                                                                                   | $P2_1$     | $[\text{BO}_3]+[\text{B}_3\text{O}_6]$                                     | 4  | 1.00 | [17]         |
| 21 | $\text{La}_4(\text{BO}_3)(\text{B}_3\text{O}_8)\text{F}_2$                                                                                                                       | $P2_1/c$   | $[\text{BO}_3]+[\text{B}_3\text{O}_8]$                                     | 4  | 1.00 | [18]         |
| 22 | $\text{Ca}_3\text{Be}_6(\text{BO}_3)_2(\text{B}_3\text{O}_{10})\text{F}$                                                                                                         | $P6_3/m$   | $[\text{BO}_3]+[\text{B}_3\text{O}_{10}]$                                  | 4  | 2.20 | [19]         |
| 23 | $\alpha\text{-Pb}_2\text{Ba}_4\text{Zn}_4(\text{B}_2\text{O}_5)(\text{B}_6\text{O}_{13})_2$                                                                                      | $P1$       | $[\text{B}_2\text{O}_5]+[\text{B}_6\text{O}_{13}]$                         | 8  | 0.71 | [20]         |
| 24 | $\beta\text{-Pb}_2\text{Ba}_4\text{Zn}_4(\text{B}_2\text{O}_5)(\text{B}_6\text{O}_{13})_2$                                                                                       | $Cc$       | $[\text{B}_2\text{O}_5]+[\text{B}_6\text{O}_{13}]$                         | 8  | 0.71 | [20]         |
| 25 | $\gamma\text{-Pb}_2\text{Ba}_4\text{Zn}_4(\text{B}_2\text{O}_5)(\text{B}_6\text{O}_{13})_2$                                                                                      | $P3_2$     | $[\text{B}_2\text{O}_5]+[\text{B}_6\text{O}_{13}]$                         | 8  | 0.71 | [20]         |
| 26 | $\text{Ba}_2\text{KZn}_3(\text{B}_3\text{O}_6)(\text{B}_6\text{O}_{13})$                                                                                                         | $P\bar{1}$ | $[\text{B}_2\text{O}_5]+[\text{B}_6\text{O}_{13}]$                         | 9  | 0.67 | [21]         |
| 27 | $\text{Ba}_4\text{K}_2\text{Zn}_5(\text{B}_3\text{O}_6)_3(\text{B}_9\text{O}_{19})$                                                                                              | $P2_1/n$   | $[\text{B}_3\text{O}_6]+[\text{B}_9\text{O}_{19}]$                         | 12 | 0.61 | [22]         |
| 28 | $\text{Cs}_{18}\text{Mg}_6(\text{B}_5\text{O}_{10})_3(\text{B}_7\text{O}_{14})_2\text{F}$                                                                                        | $C2/c$     | $[\text{B}_5\text{O}_{10}]+[\text{B}_7\text{O}_{14}]$                      | 12 | 0.83 | [23]         |
| 29 | $\text{Rb}_{18}\text{Mg}_6(\text{B}_5\text{O}_{10})_3(\text{B}_7\text{O}_{14})_2\text{F}$                                                                                        | $C2/c$     | $[\text{B}_5\text{O}_{10}]+[\text{B}_7\text{O}_{14}]$                      | 12 | 0.83 | [23]         |
| 30 | $\text{Ca}_3\text{Na}_4\text{LiBe}_4\text{B}_{10}\text{O}_{24}\text{F}$<br>/ $\text{Ca}_6\text{Na}_8\text{Li}_2\text{Be}_8(\text{BO}_3)_8(\text{B}_{12}\text{O}_{24})\text{F}_2$ | $R\bar{3}$ | $[\text{BO}_3] + [\text{B}_{12}\text{O}_{24}]$                             | 13 | 1.20 | [24]         |
| 31 | $\text{Cd}_3\text{Na}_4\text{LiBe}_4\text{B}_{10}\text{O}_{24}\text{F}$<br>/ $\text{Cd}_6\text{Na}_8\text{Li}_2\text{Be}_8(\text{BO}_3)_8(\text{B}_{12}\text{O}_{24})\text{F}_2$ | $R\bar{3}$ | $[\text{BO}_3] + [\text{B}_{12}\text{O}_{24}]$                             | 13 | 1.20 | [25]         |
| 32 | $\text{Sr}_3\text{Na}_4\text{LiBe}_4\text{B}_{10}\text{O}_{24}\text{F}$<br>/ $\text{Sr}_6\text{Na}_8\text{Li}_2\text{Be}_8(\text{BO}_3)_8(\text{B}_{12}\text{O}_{24})\text{F}_2$ | $R\bar{3}$ | $[\text{BO}_3] + [\text{B}_{12}\text{O}_{24}]$                             | 13 | 1.20 | [25]         |
| 33 | $\text{Ba}_6\text{Al}_4(\text{BO}_3)_2(\text{B}_6\text{O}_{13})(\text{B}_6\text{O}_{14})$                                                                                        | $P\bar{1}$ | $[\text{BO}_3]+[\text{B}_6\text{O}_{13}]$<br>+ $[\text{B}_6\text{O}_{14}]$ | 13 | 0.71 | [26]         |
| 34 | $\text{Ba}_4\text{Na}_2\text{Zn}_4(\text{B}_3\text{O}_6)_2(\text{B}_{12}\text{O}_{24})$                                                                                          | $P\bar{1}$ | $[\text{B}_3\text{O}_6]+[\text{B}_{12}\text{O}_{24}]$                      | 15 | 0.67 | [27]         |
| 35 | $\text{Li}_{6.58}\text{Na}_{7.43}\text{Sr}_4(\text{B}_9\text{O}_{18})(\text{B}_{12}\text{O}_{24})\text{Cl}$                                                                      | $P6_3/m$   | $[\text{B}_9\text{O}_{18}]+[\text{B}_{12}\text{O}_{24}]$                   | 21 | 0.86 | This<br>work |

<sup>a</sup> The compounds on either side of the “/” sign are the same one in the chemical formula column.

<sup>b</sup>  $N_{\text{B}}$  displays the total number of B atoms in two isolated B-O clusters.

**Table S4** Basic information of anhydrous borates with petal-like B<sub>12</sub>O<sub>24</sub> clusters.

| No. | Chemical Formula <sup>a</sup>                                                                                                                                                                                                            | Space Group | B-O Clusters                                                          | Unit Cell Dimensions                                                |                                                                   | Reference |
|-----|------------------------------------------------------------------------------------------------------------------------------------------------------------------------------------------------------------------------------------------|-------------|-----------------------------------------------------------------------|---------------------------------------------------------------------|-------------------------------------------------------------------|-----------|
| 1   | Li <sub>3</sub> NaBaB <sub>6</sub> O <sub>12</sub><br>/Li <sub>6</sub> Na <sub>2</sub> Ba <sub>2</sub> (B <sub>12</sub> O <sub>24</sub> )                                                                                                | $R\bar{3}$  | [B <sub>12</sub> O <sub>24</sub> ]                                    | $a = 9.462(9)$ (Å)<br>$b = 9.462(9)$ (Å)<br>$c = 18.71(3)$ (Å)      | $\alpha = 90^\circ$<br>$\beta = 90^\circ$<br>$\gamma = 120^\circ$ | [28]      |
| 2   | Li <sub>3</sub> KB <sub>4</sub> O <sub>8</sub> / Li <sub>9</sub> K <sub>3</sub> (B <sub>12</sub> O <sub>24</sub> )                                                                                                                       | $R\bar{3}$  | [B <sub>12</sub> O <sub>24</sub> ]                                    | $a = 9.2106(12)$ (Å)<br>$b = 9.2106(12)$ (Å)<br>$c = 19.705(5)$ (Å) | $\alpha = 90^\circ$<br>$\beta = 90^\circ$<br>$\gamma = 120^\circ$ | [29]      |
| 3   | LiNa <sub>2</sub> Sr <sub>8</sub> (B <sub>12</sub> O <sub>24</sub> )F <sub>6</sub> Cl                                                                                                                                                    | $R\bar{3}$  | [B <sub>12</sub> O <sub>24</sub> ]                                    | $a = 9.677(4)$ (Å)<br>$b = 9.677(4)$ (Å)<br>$c = 24.30(2)$ (Å)      | $\alpha = 90^\circ$<br>$\beta = 90^\circ$<br>$\gamma = 120^\circ$ | [29]      |
| 4   | Li <sub>7</sub> Na <sub>2</sub> KRb <sub>2</sub> (B <sub>12</sub> O <sub>24</sub> )                                                                                                                                                      | $R\bar{3}$  | [B <sub>12</sub> O <sub>24</sub> ]                                    | $a = 9.548(6)$ (Å)<br>$b = 9.548(6)$ (Å)<br>$c = 19.55(2)$ (Å)      | $\alpha = 90^\circ$<br>$\beta = 90^\circ$<br>$\gamma = 120^\circ$ | [30]      |
| 5   | Li <sub>7.35</sub> Na <sub>2.36</sub> K <sub>1.50</sub> Cs <sub>0.78</sub> (B <sub>12</sub> O <sub>24</sub> )                                                                                                                            | $R\bar{3}$  | [B <sub>12</sub> O <sub>24</sub> ]                                    | $a = 9.479(7)$ (Å)<br>$b = 9.479(7)$ (Å)<br>$c = 19.493(14)$ (Å)    | $\alpha = 90^\circ$<br>$\beta = 90^\circ$<br>$\gamma = 120^\circ$ | [30]      |
| 6   | Li <sub>6.97</sub> Na <sub>2.63</sub> K <sub>1.24</sub> Cs <sub>1.15</sub> (B <sub>12</sub> O <sub>24</sub> )                                                                                                                            | $R\bar{3}$  | [B <sub>12</sub> O <sub>24</sub> ]                                    | $a = 9.5297(12)$ (Å)<br>$b = 9.5297(12)$ (Å)<br>$c = 19.534(5)$ (Å) | $\alpha = 90^\circ$<br>$\beta = 90^\circ$<br>$\gamma = 120^\circ$ | [30]      |
| 7   | Li <sub>7.27</sub> Na <sub>2.67</sub> Rb <sub>2.06</sub> (B <sub>12</sub> O <sub>24</sub> )                                                                                                                                              | $R\bar{3}$  | [B <sub>12</sub> O <sub>24</sub> ]                                    | $a = 9.4530(9)$ (Å)<br>$b = 9.4530(9)$ (Å)<br>$c = 19.413(3)$ (Å)   | $\alpha = 90^\circ$<br>$\beta = 90^\circ$<br>$\gamma = 120^\circ$ | [30]      |
| 8   | Ca <sub>3</sub> LiNa <sub>4</sub> Be <sub>4</sub> B <sub>10</sub> O <sub>24</sub> F<br>/Ca <sub>6</sub> Li <sub>2</sub> Na <sub>8</sub> Be <sub>8</sub> (BO <sub>3</sub> ) <sub>8</sub> (B <sub>12</sub> O <sub>24</sub> )F <sub>2</sub> | $R\bar{3}$  | [BO <sub>3</sub> ] <sup>+</sup><br>[B <sub>12</sub> O <sub>24</sub> ] | $a = 9.2851(11)$ (Å)<br>$b = 9.2851(11)$ (Å)<br>$c = 38.042(8)$ (Å) | $\alpha = 90^\circ$<br>$\beta = 90^\circ$<br>$\gamma = 120^\circ$ | [24]      |
| 9   | Cd <sub>3</sub> LiNa <sub>4</sub> Be <sub>4</sub> B <sub>10</sub> O <sub>24</sub> F<br>/Cd <sub>6</sub> Li <sub>2</sub> Na <sub>8</sub> Be <sub>8</sub> (BO <sub>3</sub> ) <sub>8</sub> (B <sub>12</sub> O <sub>24</sub> )F <sub>2</sub> | $R\bar{3}$  | [BO <sub>3</sub> ] <sup>+</sup><br>[B <sub>12</sub> O <sub>24</sub> ] | $a = 9.3019(8)$ (Å)<br>$b = 9.3019(8)$ (Å)<br>$c = 37.782(7)$ (Å)   | $\alpha = 90^\circ$<br>$\beta = 90^\circ$<br>$\gamma = 120^\circ$ | [25]      |



|    |                                                                                                                                                                                  |            |                                                                 |                                                                                                  |                                                                   |              |
|----|----------------------------------------------------------------------------------------------------------------------------------------------------------------------------------|------------|-----------------------------------------------------------------|--------------------------------------------------------------------------------------------------|-------------------------------------------------------------------|--------------|
| 10 | $\text{Sr}_3\text{LiNa}_4\text{Be}_4\text{B}_{10}\text{O}_{24}\text{F}$<br>/ $\text{Sr}_6\text{Li}_2\text{Na}_8\text{Be}_8(\text{BO}_3)_8(\text{B}_{12}\text{O}_{24})\text{F}_2$ | $R\bar{3}$ | $[\text{BO}_3]^+$<br>$[\text{B}_{12}\text{O}_{24}]$             | $a = 9.4645(1) \text{ (\AA)}$<br>$b = 9.4645(1) \text{ (\AA)}$<br>$c = 38.842(8) \text{ (\AA)}$  | $\alpha = 90^\circ$<br>$\beta = 90^\circ$<br>$\gamma = 120^\circ$ | [25]         |
| 11 | $\text{Li}_{6.58}\text{Na}_{7.43}\text{Sr}_4(\text{B}_9\text{O}_{18})(\text{B}_{12}\text{O}_{24})\text{Cl}$                                                                      | $P6_3/m$   | $[\text{B}_9\text{O}_{18}]^+$<br>$[\text{B}_{12}\text{O}_{24}]$ | $a = 9.3046(2) \text{ (\AA)}$<br>$b = 9.3046(2) \text{ (\AA)}$<br>$c = 24.3239(7) \text{ (\AA)}$ | $\alpha = 90^\circ$<br>$\beta = 90^\circ$<br>$\gamma = 120^\circ$ | This<br>work |

---

<sup>a</sup> The compounds on either side of the “/” sign are the same one in the chemical formula column.

**Table S5** The assignments of the IR absorption peaks for  $\text{Li}_{6.58}\text{Na}_{7.43}\text{Sr}_4(\text{B}_9\text{O}_{18})(\text{B}_{12}\text{O}_{24})\text{Cl}$

| Mode description                                          | IR ( $\text{cm}^{-1}$ ) |
|-----------------------------------------------------------|-------------------------|
| Asymmetric stretching vibration of $[\text{BO}_3]$ groups | 1443, 1281, 1234        |
| Asymmetric stretching vibration of $[\text{BO}_4]$ groups | 1149, 1092, 1018        |
| Symmetric stretching vibration of $[\text{BO}_3]$ groups  | 952                     |
| Symmetric stretching vibration of $[\text{BO}_4]$ groups  | 879                     |
| Out-of-plane bending of $[\text{BO}_3]$ groups            | 732, 644                |
| In-plane bending of $[\text{BO}_3]$ groups                | 590, 517                |
| Bending of $[\text{BO}_4]$ groups                         | 400–500                 |

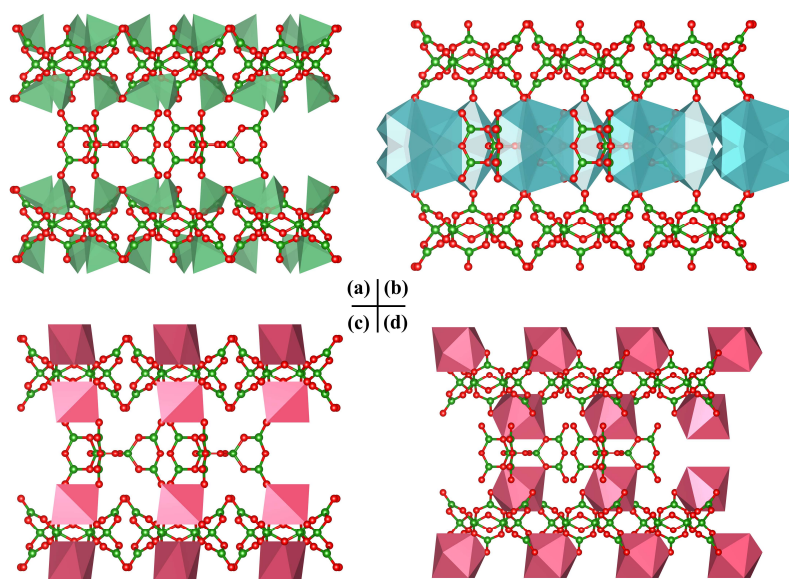

**Fig. S1** Coordination polyhedra and arrangement mode of the (a) Li(1), (b) Na(1), (c) Sr(2), and (d) Sr(1) atoms in the title compound.

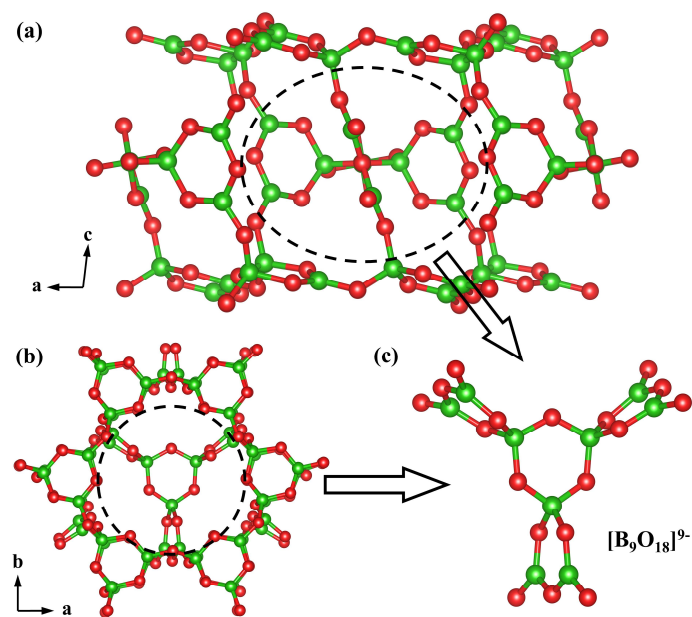

**Fig. S2** The  $[\text{B}_9\text{O}_{18}]^{9-}$  group in  $\text{Na}_{11}\text{B}_{21}\text{O}_{36}\text{X}_2$  ( $\text{X} = \text{Cl}, \text{Br}$ ) acting as a connecting unit.

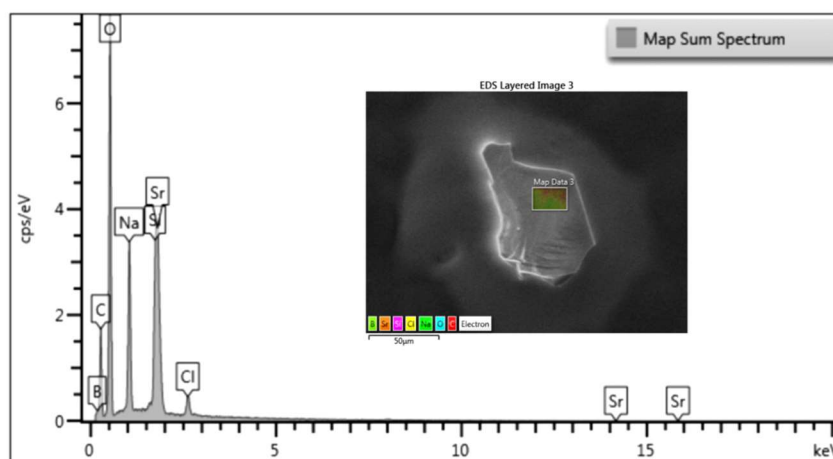

**Fig. S3** Elemental analysis of  $\text{Li}_{6.58}\text{Na}_{7.43}\text{Sr}_4(\text{B}_9\text{O}_{18})(\text{B}_{12}\text{O}_{24})\text{Cl}$ . Energy dispersive X-ray spectroscopy (EDS) was performed to verify the presence of the corresponding elements (except Li) in the compound.

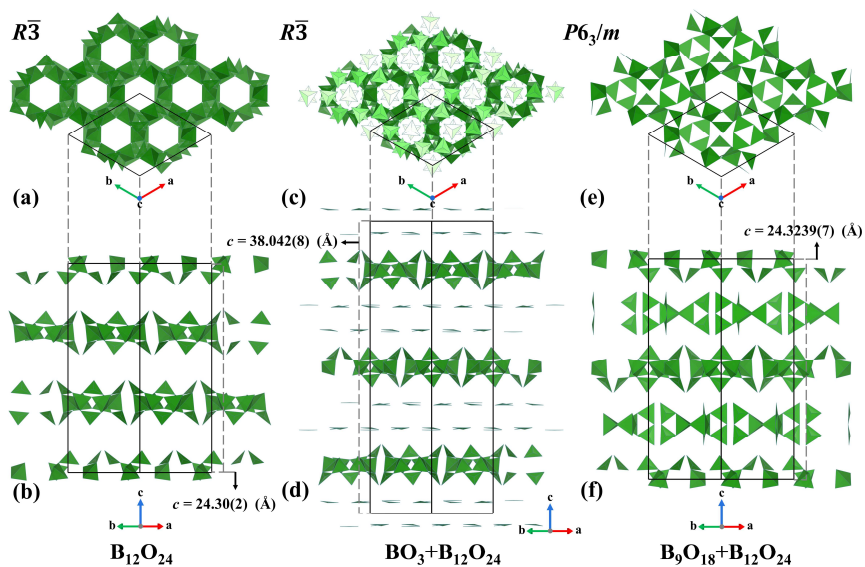

**Fig. S4** The structural transformation of space group from  $LiNa_2Sr_8(B_{12}O_{24})F_6Cl$  to  $Ca_6Li_2Na_8Be_8(BO_3)_8(B_{12}O_{24})F_2$  to  $Li_{6.58}Na_{7.43}Sr_4(B_9O_{18})(B_{12}O_{24})Cl$ . (Considering about the great influence of the B-O clusters on the structure of the compounds, and in order to keep the picture simple and easy to understand, only the arrangement of the B-O polyhedra is shown in the picture.)

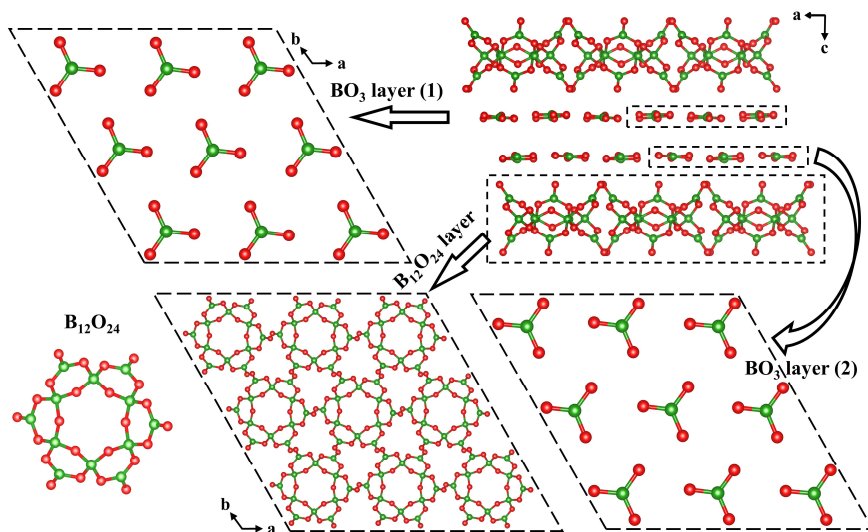

**Fig. S5** The  $\text{BO}_3$  and  $\text{B}_{12}\text{O}_{24}$  groups in  $\text{M}_3\text{LiNa}_4\text{Be}_4\text{B}_{10}\text{O}_{24}\text{F}$  ( $\text{M} = \text{Sr}, \text{Cd}, \text{Ca}$ ) with the lamellar arrangement.

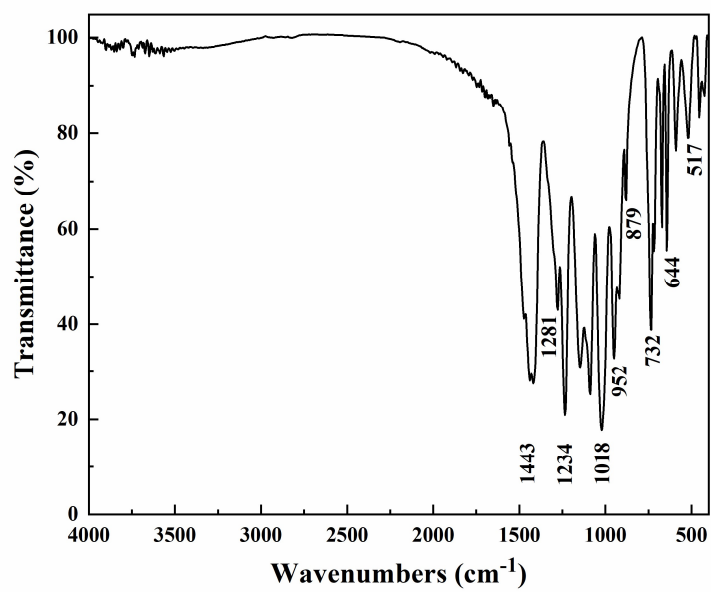

**Fig. S6** The infrared spectrum of  $\text{Li}_{6.58}\text{Na}_{7.43}\text{Sr}_4(\text{B}_9\text{O}_{18})(\text{B}_{12}\text{O}_{24})\text{Cl}$ .



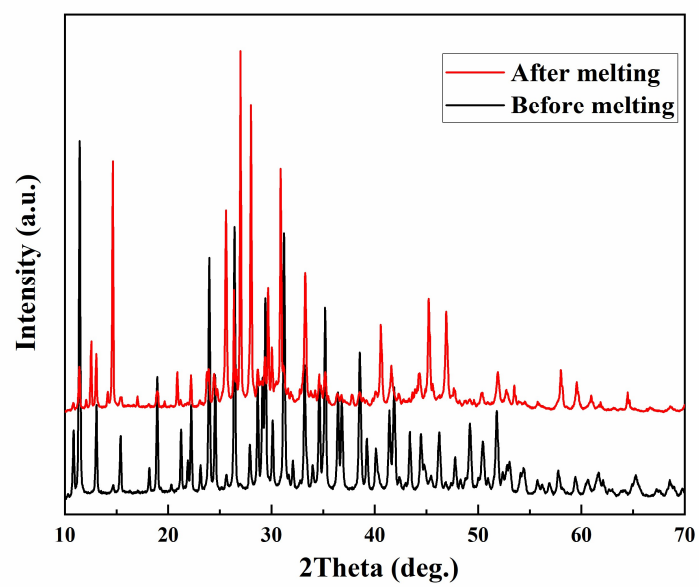

**Fig. S7** The X-ray diffraction patterns of  $\text{Li}_{6.58}\text{Na}_{7.43}\text{Sr}_4(\text{B}_9\text{O}_{18})(\text{B}_{12}\text{O}_{24})\text{Cl}$  before and after melting.

## Reference

- 1 S. A. Hering, A. Haberer, R. Kaindl and H. Huppertz, High-pressure synthesis and crystal structure of the new holmium oxoborate  $\text{Ho}_{31}\text{O}_{27}(\text{BO}_3)_3(\text{BO}_4)_6$ , *Solid State Sci.*, 2010, **12**, 1993–2002.
- 2 M. Gasperin, Synthese et structure du tetraborouranate de nickel,  $\text{Ni}_7\text{B}_4\text{UO}_{16}$ , *Acta Crystallogr. C*, 1989, **45**, 981–983.
- 3 Y. Wang, J. Han, J. B. Huang, Z. H. Yang and S. L. Pan,  $\text{Al}_8(\text{BO}_3)_4(\text{B}_2\text{O}_5)\text{F}_8$ : A F-containing aluminum borate featuring two types of isolated B–O groups, *Inorg. Chem.*, 2020, **59**, 810–817.
- 4 M. Mutailipu, X. Su, M. Zhang, Z. H. Yang and S. L. Pan,  $\text{Ba}_{n+2}\text{Zn}_n(\text{BO}_3)_n(\text{B}_2\text{O}_5)\text{F}_n$  ( $n = 1, 2$ ): New members of the zincoborate fluoride series with two kinds of isolated B–O units, *Inorg. Chem. Front.*, 2017, **4**, 281–288.
- 5 P. D. Thompson, J. Huang, R. W. Smith and D. A. Keszler, The mixed orthoborate pyroborates  $\text{Sr}_2\text{Sc}_2\text{B}_4\text{O}_{11}$  and  $\text{Ba}_2\text{Sc}_2\text{B}_4\text{O}_{11}$ : Pyroborate geometry, *J. Solid State Chem.*, 1991, **95**, 126–135.
- 6 N. G. Furmanova, B. A. Maksimov, V. N. Molchanov, A. E. Kokh, N. G. Kononova and P. P. Fedorov, Crystal structure of the new barium borate  $\text{Ba}_5(\text{BO}_3)_2(\text{B}_2\text{O}_5)$ , *Crystallogr. Rep.*, 2006, **51**, 219–224.
- 7 H. Behm, Pentadecacopper(II) bisdiborate hexaorthoborate dioxide, *Acta Crystallogr. B*, 1982, **38**, 2781–2784.
- 8 J. Schaefer and K. Bluhm, Synthese und Kristallstruktur von  $\text{Cu}_9\text{Ti}_2[\text{B}_2\text{O}_5]_2[\text{BO}_3]_2\text{O}_6$  — ein Kupfertitanboratpyroboratoxid?, *Z. Anorg. Allg. Chem.*, 1994, **620**, 1583–1588.
- 9 Y. C. Hao, P. Kegler, D. Bosbach, T. E. Albrecht-Schmitt, S. A. Wang and E. V. Alekseev, Divergent structural chemistry of uranyl borates obtained from solid state and hydrothermal conditions, *Cryst. Growth Des.*, 2017, **17**, 5898–5907.
- 10 H. W. Huang, L. J. Liu, S. F. Jin, W. J. Yao, Y. H. Zhang and C. T. Chen, Deep-ultraviolet nonlinear optical materials:  $\text{Na}_2\text{Be}_4\text{B}_4\text{O}_{11}$  and  $\text{LiNa}_5\text{Be}_{12}\text{B}_{12}\text{O}_{33}$ , *J. Am. Chem. Soc.*, 2013, **135**, 18319–18322.
- 11 H. W. Yu, S. L. Pan, H. P. Wu, W. W. Zhao, F. F. Zhang, H. Y. Li and Z. H. Yang, A new congruent-melting oxyborate,  $\text{Pb}_4\text{O}(\text{BO}_3)_2$  with optimally aligned  $\text{BO}_3$  triangles adopting layered-type arrangement, *J. Mater. Chem.*, 2012, **22**, 2105–2110.
- 12 W. B. Zhang, W. Q. Jin, S. J. Han, Z. H. Yang and S. L. Pan,  $\text{Pb}_3\text{Ba}_7\text{B}_7\text{O}_{20}\text{F}$ : A new nonlinear optical material exhibiting large second harmonic generation response induced by its unprecedented Pb-B-O framework, *Scr. Mater.*, 2021, **194**, 113700.
- 13 N. Yu and N. Ye, Distrontium lithium beryllium triborate,  $\text{Sr}_2\text{LiBeB}_3\text{O}_8$ , *Acta Crystallogr. E*, 2012, **68**, i32.
- 14 X. Xu, C. L. Hu, F. Kong, J. H. Zhang and J. G. Mao,  $\text{Ca}_{10}\text{Ge}_{16}\text{B}_6\text{O}_{51}$  and

- Cd<sub>12</sub>Ge<sub>17</sub>B<sub>8</sub>O<sub>58</sub>: Two types of new 3D frameworks based on BO<sub>4</sub> tetrahedra and 1D [Ge<sub>4</sub>O<sub>12</sub>]<sub>n</sub> chains, *Inorg. Chem.*, 2011, **50**, 8861–8868.
- 15 S. G. Zhao, J. Zhang, S. Q. Zhang, Z. H. Sun, Z. S. Lin, Y. C. Wu, M. C. Hong and J. H. Luo, A new UV nonlinear optical material CsZn<sub>2</sub>B<sub>3</sub>O<sub>7</sub>: ZnO<sub>4</sub> tetrahedra double the efficiency of second-harmonic generation, *Inorg. Chem.*, 2014, **53**, 2521–2527.
- 16 H. W. Yu, H. P. Wu, S. L. Pan, Z. H. Yang, X. L. Hou, X. Su, Q. Jing, K. R. Poeppelmeier and J. M. Rondinelli, Cs<sub>3</sub>Zn<sub>6</sub>B<sub>9</sub>O<sub>21</sub>: A chemically benign member of the KBBF family exhibiting the largest second harmonic generation response, *J. Am. Chem. Soc.*, 2014, **136**, 1264–1267.
- 17 S. C. Wang, N. Ye, W. Li and D. Zhao, Alkaline beryllium borate NaBeB<sub>3</sub>O<sub>6</sub> and ABe<sub>2</sub>B<sub>3</sub>O<sub>7</sub> (A = K, Rb) as UV nonlinear optical crystals, *J. Am. Chem. Soc.*, 2010, **132**, 8779–8786.
- 18 A. Haberer, R. Kaindl, O. Oeckler and H. Huppertz, A new structure type of RE<sub>4</sub>B<sub>4</sub>O<sub>11</sub>F<sub>2</sub>: High-pressure synthesis and crystal structure of La<sub>4</sub>B<sub>4</sub>O<sub>11</sub>F<sub>2</sub>, *J. Solid State Chem.*, 2010, **183**, 1970–1979.
- 19 W. J. Yao, T. Xu, X. X. Jiang, H. W. Huang, X. Y. Wang, Z. S. Lin and C. T. Chen, Ca<sub>3</sub>Be<sub>6</sub>B<sub>5</sub>O<sub>16</sub>F: The first alkaline-earth beryllium borate with fluorine anions, *Dalton Trans.*, 2014, **43**, 9998–10004.
- 20 H. W. Yu, H. P. Wu, Q. Jing, Z. H. Yang, P. S. Halasyamani and S. L. Pan, Polar polymorphism:  $\alpha$ -,  $\beta$ -, and  $\gamma$ -Pb<sub>2</sub>Ba<sub>4</sub>Zn<sub>4</sub>B<sub>14</sub>O<sub>31</sub> – Synthesis, characterization, and nonlinear optical properties, *Chem. Mater.*, 2015, **27**, 4779–4788.
- 21 S. Busche and K. Bluhm, Zur Synthese und Kristallstruktur von Dibariumkaliumtrizinkborat Ba<sub>2</sub>KZn<sub>3</sub>(B<sub>3</sub>O<sub>6</sub>)(B<sub>6</sub>O<sub>13</sub>)/Synthesis and crystal structure of di-barium potassium tri-zinc borate Ba<sub>2</sub>KZn<sub>3</sub>(B<sub>3</sub>O<sub>6</sub>)(B<sub>6</sub>O<sub>13</sub>), *Z. Naturforsch. B*, 1996, **51**, 319–324.
- 22 X. A. Chen, Y. J. Chen, L. Wu, X. A. Chang and W. Q. Xiao, Synthesis, crystal structure, and spectrum properties of a new borate Ba<sub>4</sub>K<sub>2</sub>Zn<sub>5</sub>(B<sub>3</sub>O<sub>6</sub>)<sub>3</sub>(B<sub>9</sub>O<sub>19</sub>) with two isolated types of blocks: 3[3 $\Delta$ ] and 3[2 $\Delta$  + 1T] + 3 $\Delta$  + 3[2 $\Delta$  + 1T], *Solid State Sci.*, 2014, **27**, 47–54.
- 23 Z. Wang, M. Zhang, X. Su, S. L. Pan, Z. H. Yang, H. Zhang and L. Liu, Q<sub>18</sub>Mg<sub>6</sub>(B<sub>5</sub>O<sub>10</sub>)<sub>3</sub>(B<sub>7</sub>O<sub>14</sub>)<sub>2</sub>F (Q = Rb and Cs): New borates containing two large isolated polyborate anions with similar topological structures, *Chem. Eur. J.*, 2015, **21**, 1414–1419.
- 24 S. Y. Luo, W. J. Yao, P. F. Gong, J. Y. Yao, Z. S. Lin and C. T. Chen, Ca<sub>3</sub>Na<sub>4</sub>LiBe<sub>4</sub>B<sub>10</sub>O<sub>24</sub>F: A new beryllium borate with a unique beryl borate  $\infty^2$ [Be<sub>8</sub>B<sub>16</sub>O<sub>40</sub>F<sub>2</sub>] layer intrabridged by [B<sub>12</sub>O<sub>24</sub>] groups, *Inorg. Chem.*, 2014, **53**, 8197–8199.
- 25 X. S. Wang, L. J. Liu, M. J. Xia, X. Y. Wang and C. T. Chen, Two isostructural multi-metal borates: Syntheses, crystal structures and characterizations of

- $M_3LiNa_4Be_4B_{10}O_{24}F$  ( $M = Sr, Cd$ ), *Chinese J. Struc. Chem.*, 2015, **34**, 1617–1625.
- 26 X. A. Chen, J. Y. Yue, X. A. Chang and W. Q. Xiao, Synthesis and characterization of a new borate  $Ba_6Al_4B_{14}O_{33}$  with building blocks of  $AlO_4$ ,  $Al_4O_{14}$ ,  $BO_3$ ,  $B_6O_{14}$ , and  $B_6O_{13}$ , *J. Solid State Chem.*, 2017, **245**, 174–183.
- 27 X. A. Chen, Y. J. Chen, C. Sun, X. A. Chang and W. Q. Xiao, Synthesis, crystal structure, spectrum properties, and electronic structure of a new three-borate  $Ba_4Na_2Zn_4(B_3O_6)_2(B_{12}O_{24})$  with two isolated types of blocks:  $3[3\Delta]$  and  $3[2\Delta+1T]$ , *J. Alloys Compd.*, 2013, **568**, 60–67.
- 28 S. J. Chen, S. L. Pan, W. W. Zhao, Z. H. Yang, H. P. Wu and Y. Yang, Synthesis, crystal structure and characterization of a new compound,  $Li_3NaBaB_6O_{12}$ , *Solid State Sci.*, 2012, **14**, 1186–1190.
- 29 H. P. Wu, H. W. Yu, S. L. Pan, A. Q. Jiao, J. Han, K. Wu, S. J. Han and H. Y. Li, New type of complex alkali and alkaline earth metal borates with isolated  $(B_{12}O_{24})^{12-}$  anionic group, *Dalton Trans.*, 2014, **43**, 4886–4891.
- 30 T. Baiheti, S. J. Han, B. Bashir, Z. H. Yang, Y. Wang, H. H. Yu and S. L. Pan, Four new deep ultraviolet borates with isolated  $B_{12}O_{24}$  groups: Synthesis, structure, and optical properties, *J. Solid State Chem.*, 2019, **273**, 112–116.
